# Supplementary material for: Discovery of NAD(P)H:quinone oxidoreductase 1 (NQO1) inhibitors with novel chemical scaffolds by shape-based virtual screening combined with cascade docking
Source: Royal Society of Chemistry journal article supplement (doi:10.1039/c5ra05919d), 2015-01-01
Supplement: c5ra05919d1.pdf [file c5ra05919d1.pdf]

# **Discovery of NAD(P)H:quinone oxidoreductase 1 (NQO1) inhibitors with novel chemical scaffolds by shape-based virtual screening combined with cascade docking**

Jinlei Bian<sup>a,c</sup>, Xue Qian<sup>a,c</sup>, Bang Deng <sup>a,c</sup>, Xiaoli Xu<sup>a,c</sup>, Xiaoke Guo<sup>a,c</sup>, Yalou Wang <sup>a,c,\*</sup>, Xiang  
Li<sup>a,c</sup>, Haopeng Sun<sup>a,c</sup>, Qidong You <sup>a,b,c,\*</sup>, Xiaojin Zhang <sup>a,d,\*</sup>

*<sup>a</sup>Jiangsu Key Laboratory of Drug Design and Optimization, China Pharmaceutical University, Nanjing, 210009,  
China*

*<sup>b</sup> State Key Laboratory of Natural Medicines, China Pharmaceutical University, Nanjing, 210009, China*

*<sup>c</sup> Department of Medicinal Chemistry, School of Pharmacy, China Pharmaceutical University, Nanjing, 210009,  
China*

*<sup>d</sup> Department of Organic Chemistry, School of Science, China Pharmaceutical University, Nanjing, 210009, China*

**\*Corresponding authors**

**E-mail addresses:**

wang\_yalou@tom.com (Y. Wang)

youqidong@gmail.com (Q. You)

zxj@cpu.edu.cn (X. Zhang)

**Table S1**

Structures of NQO1 inhibitors used to develop the active set for ROCS model and docking model. (Biological values used in this study were from references 1 and 2).

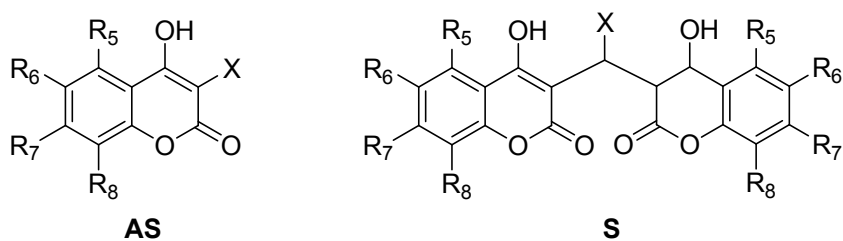

| Cmpd | R5               | R6               | R7                                | R8              | X                                                                                     | pIC <sub>50</sub> (M) |
|------|------------------|------------------|-----------------------------------|-----------------|---------------------------------------------------------------------------------------|-----------------------|
| S1   | H                | H                | H                                 | H               | H                                                                                     | 6.39                  |
| S2   | H                | CH <sub>3</sub>  | H                                 | H               | H                                                                                     | 5.25                  |
| S3   | OCH <sub>3</sub> | H                | H                                 | H               | H                                                                                     | 7.42                  |
| S4   | H                | OCH <sub>3</sub> | H                                 | H               | H                                                                                     | 5.48                  |
| S5   | H                | F                | H                                 | H               | H                                                                                     | 5.80                  |
| S6   | H                | CH <sub>3</sub>  | CH <sub>3</sub>                   | H               | H                                                                                     | 6.63                  |
| S7   | H                | H                | 7,8-C <sub>4</sub> H <sub>4</sub> |                 | H                                                                                     | 6.43                  |
| S8   | H                | H                | CH <sub>3</sub>                   | CH <sub>3</sub> | H                                                                                     | 7.02                  |
| S9   | H                | H                | OH                                | H               | H                                                                                     | 6.46                  |
| S10  | H                | H                | H                                 | H               |   | 5.30                  |
| S11  | H                | H                | H                                 | H               |  | 5.23                  |
| S12  | H                | H                | H                                 | H               |   | 6.19                  |

|            |   |                                   |                                   |   |                     |      |
|------------|---|-----------------------------------|-----------------------------------|---|---------------------|------|
| <b>AS1</b> | H | CH <sub>3</sub>                   | CH <sub>3</sub>                   | H | 1-naphthyl          | 5.96 |
| <b>AS2</b> | H | CH <sub>3</sub>                   | CH <sub>3</sub>                   | H | 2-naphthyl          | 6.78 |
| <b>AS3</b> | H | H                                 | 7,8-C <sub>4</sub> H <sub>4</sub> |   | 2-naphthyl          | 6.59 |
| <b>AS4</b> |   | 5,6-C <sub>4</sub> H <sub>4</sub> | H                                 | H | 1-naphthyl          | 6.21 |
| <b>AS5</b> |   | 5,6-C <sub>4</sub> H <sub>4</sub> | H                                 | H | Phenyl              | 6.33 |
| <b>AS6</b> | H | CH <sub>3</sub>                   | CH <sub>3</sub>                   | H | 3,4-dimethyl phenyl | 6.72 |

## Reference

- [1] K.A. Nolan, H. Zhao, P.F. Faulder, A.D. Frenkel, D.J. Timson, D. Siegel, D. Ross, T.R. Burke Jr, I.J. Stratford, R.A. Bryce, Coumarin-based inhibitors of human NAD(P)H: quinone oxidoreductase-1. Identification, structure–activity, off-target effects and in vitro human pancreatic cancer toxicity, *J. Med. Chem.* 50 (2007) 6316-6325.
- [2] K.A. Nolan, J.R. Doncaster, M.S. Dunstan, K.A. Scott, A.D. Frenkel, D. Siegel, R.A. Bryce, Synthesis and biological evaluation of coumarin-based inhibitors of NAD(P)H: quinone oxidoreductase-1 (NQO1), *J. Med. Chem.* 52 (2009) 7142-7156.
